# Supplementary material for: Improvement of Standardization of Molecular Analyses in Hematology: The 10-year GBMHM French Experience
Source: PubMed Central journal article supplement — Hemasphere. 2021 Nov 17;5(12):e658. doi: 10.1097/HS9.0000000000000658 (PMC8598224; doi:10.1097/hs9.0000000000000658), 2021-11-17
Supplement: hs9-5-e658-s001.pdf [file hs9-5-e658-s001.pdf]

**Supplemental file 1** : for quantitative programs (eg: *BCR-ABL1*, *JAK2*), the calculation of the consensus average is based on all laboratory results, excluding outliers (defined as more than 2 standard deviations around the consensus average). A mark is then assigned to the laboratory using the Z-score method :

$$Z\text{-score} = \frac{\text{Laboratory result} - \text{Consensus average}}{\text{Standard deviation}}$$

To each value of Z-score is assigned a score according to the following table :

| Z-score | -3                          | -2          | -1                                         | 0           | +1                          | +2 | +3 |
|---------|-----------------------------|-------------|--------------------------------------------|-------------|-----------------------------|----|----|
|         | Out of limit « to control » | Good result | Target value :<br><i>Consensus average</i> | Good result | Out of limit « to control » |    |    |
| Score   | D                           | C           | B                                          | A           | B                           | C  | D  |
